# Supplementary material
Source: PubMed Central journal article supplement (PMC8325337)
Supplement: pnas.2105288118.sapp.pdf [file pnas.2105288118.sapp.pdf]

**Supplemental Table 1** Primers used for sequencing

| <b>Name</b> | <b>Sense/Anti-sense</b> | <b>Sequence (5' to 3')</b>      |
|-------------|-------------------------|---------------------------------|
| 1F          | Sense                   | AAAACAGCCTGTGGGTTGATCC          |
| 2F          | Sense                   | TAGCACTCTGGTATCACGGTACC         |
| 3F          | Sense                   | TGCTTATGGTGACAATTGAGAGATTG      |
| 4F          | Sense                   | GAACCAGTGAAAGATATCATGATTAAATCAC |
| 5F          | Sense                   | CATCCGGGTCCAACAAGTTG            |
| 6F          | Sense                   | TACCAGATACCTGTGAGATCCAA         |
| 7F          | Sense                   | TATTTTCGCAGCAAACACTTTTTCCAGG    |
| 8F          | Sense                   | TACGTGTGGCAAACATCTACGA          |
| 9F          | Sense                   | TACAACAGAGACCTCTTAGTGAGCA       |
| 10F         | Sense                   | TGGTGAGGAACCACGATGACC           |
| 11F         | Sense                   | AGTCCAAATGCCGTATTG              |
| 12F         | Sense                   | TTGAGGCACTGTTCCAGG              |
| 13F         | Sense                   | AGACATCAGAGGCTTCTTAGC           |
| 14F         | Sense                   | ATCCATGTTGGTGGAAATGG            |
| 15F         | Sense                   | ACCTAAACCCAGGGGTTGTG            |
| 16F         | Sense                   | TCCTAAAGAGGTATTTTAGAGCAG        |
| 1aR         | Anti-sense              | TGAGCGAAACACTCTGCAAC            |
| 1R          | Anti-sense              | ACCATAAGCAGCCAGTATAGG           |
| 2R          | Anti-sense              | AGTCGTTATGGTGGAGTTACC           |
| 3R          | Anti-sense              | GTGTATGGCATCACAATTGTAGC         |
| 4R          | Anti-sense              | AGCCGAATACTTGCGTTCC             |
| 5R          | Anti-sense              | ACATGATGTAACAGGAGCTTTGG         |
| 6R          | Anti-sense              | ATTCGTAGATGTTTGCCACACG          |
| 7aR         | Anti-sense              | CTGCTAAAAGCACATGGGATTGG         |
| 7bR         | Anti-sense              | ACACAGTTTTTGCCACGTCA            |
| 8R          | Anti-sense              | GTGGTTCCTCACCACAATTAC           |
| 9R          | Anti-sense              | ATCGAAGTGATCTGGGTCTGG           |
| 10R         | Anti-sense              | ATGAAAGCCCGACTGACATG            |
| 11R         | Anti-sense              | TCTGATGTCTCTGAACTTCTC           |

|            |            |                           |
|------------|------------|---------------------------|
| <b>12R</b> | Anti-sense | CCATTTCCACCAACATGGAT      |
| <b>13R</b> | Anti-sense | GCACTCGTTGTTAGATCAAG      |
| <b>14R</b> | Anti-sense | TACAGGTGATGGGAGTTGCA      |
| <b>15R</b> | Anti-sense | CGTGTATGTCTTTCATGGGCATAAC |
| <b>16R</b> | Anti-sense | ACCGAATGCGGAGAATTTACC     |
